# Supplementary material
Source: PubMed Central journal article supplement (PMC4364609)
Supplement: NIHMS666648-supplement-correction.pdf [file NIHMS666648-supplement-correction.pdf]

ERRATUM

Volume 136, Number 3, May 14, 1986

In the article "N<sup>6</sup>-Functionalized Congeners of Adenosine with High Potency at A<sub>2</sub>-Adenosine Receptors: Potential Ligands for Affinity Chromatography" by Kenneth A. Jacobson, Noboyiuki Yamada, Kenneth L. Kirk, John W. Daly, and R. A. Olsson, pages 1097—1102:

Page 1100, Table 1, the values for compounds 13-19 in the last three columns are incorrect. For the readers' convenience, the corrected Table 1 is reproduced on the following page.

Table 1. Potency of adenosine analogues at a coronary A<sub>2</sub>-adenosine receptor and at a brain A<sub>1</sub>-receptor

| Analogue                                                                                                                                                                                                 | A <sub>2</sub> Receptor |                                | A <sub>1</sub> Receptor          | EC <sub>50</sub> (A <sub>2</sub> ) |
|----------------------------------------------------------------------------------------------------------------------------------------------------------------------------------------------------------|-------------------------|--------------------------------|----------------------------------|------------------------------------|
|                                                                                                                                                                                                          | MPR <sup>a</sup>        | Estimated Potency <sup>b</sup> | K <sub>i</sub> (nM) <sup>c</sup> | K <sub>i</sub> (A <sub>1</sub> )   |
|                                                                                                                                                                                                          | to Ado                  | EC <sub>50</sub> (nM)          |                                  |                                    |
| <u>1</u> NECA                                                                                                                                                                                            | 150                     | 8                              | 5.1                              | 1.6                                |
| <u>2</u> 2-chloroadenosine                                                                                                                                                                               | 27                      | 44                             | 6.7                              | 6.6                                |
| <u>3</u> N <sup>6</sup> -methyladenosine                                                                                                                                                                 | 0.05                    | 24,000                         | 60                               | 400                                |
| <u>4</u> R-PIA                                                                                                                                                                                           | 4.3                     | 280                            | 1.2                              | 230                                |
| <u>5</u> CHA                                                                                                                                                                                             | 1.6                     | 750                            | 0.85                             | 880                                |
| <u>6</u> N <sup>6</sup> -phenyladenosine                                                                                                                                                                 | 1.4                     | 860                            | 3.3                              | 260                                |
| <u>7</u> N <sup>6</sup> -p-tolyladenosine                                                                                                                                                                | 1.35                    | 890                            | 2.5                              | 360                                |
| <u>8</u> OH                                                                                                                                                                                              |                         | [27% @ 21μM] <sup>d</sup>      | 210                              | -                                  |
| <u>9</u> NHCH <sub>3</sub>                                                                                                                                                                               | 4.9±1.3                 | 240                            | 16                               | 15                                 |
| <u>10</u> NH-                                                                                                           | 2.1±1.3                 | 570                            | 1.7                              | 340                                |
| <u>11</u> NH-  -CH <sub>2</sub> -    | 3.0±0.7                 | 400                            | 18                               | 22                                 |
| <u>12</u> NH-  -CH <sub>2</sub> -  | 4.4±0.4                 | 270                            | 13                               | 21                                 |
| R = NH-  -CH <sub>2</sub> -COR'                                                                                       |                         |                                |                                  |                                    |
| <u>13</u> OCH <sub>3</sub>                                                                                                                                                                               | 3.2±1.6                 | 380                            | 2.5                              | 150                                |
| <u>14</u> NHCH <sub>3</sub>                                                                                                                                                                              | 7.2±1.3                 | 170                            | 6.7                              | 25                                 |
| <u>15</u> NHNH <sub>2</sub>                                                                                                                                                                              | 3.5±0.8                 | 340                            | 4.5                              | 80                                 |
| <u>16</u> NH(CH <sub>2</sub> ) <sub>2</sub> NH <sub>2</sub>                                                                                                                                              | 7.8±2.5                 | 150                            | 0.85                             | 180                                |
| <u>17</u> NH(CH <sub>2</sub> ) <sub>2</sub> NHCO(CH <sub>2</sub> ) <sub>2</sub> -                                     | 2.8±0.1                 | 430                            | 4.5                              | 96                                 |
| <u>18</u> NH(CH <sub>2</sub> ) <sub>2</sub> NH-CO-biotin                                                                                                                                                 | 3.0±0.2                 | 400                            | 11.4                             | 35                                 |
| <u>19</u> NH(CH <sub>2</sub> ) <sub>2</sub> NHCO(CH <sub>2</sub> ) <sub>5</sub> NH-CO-biotin                                                                                                             | 10.2±7.3                | 120                            | 18                               | 6.7                                |

<sup>a</sup>Molar potency ratio relative to adenosine, which is set equal to 1.0.

<sup>b</sup>Estimated IC<sub>50</sub> values based on potency of adenosine (MPR = 1.0) of 1,200±150 nM (6).

<sup>c</sup>K<sub>i</sub> values for antagonism of binding of 1 nM [<sup>3</sup>H]N<sup>6</sup>-cyclohexyladenosine to rat cerebral cortical membranes (data from 3, 4, 12).

<sup>d</sup>Highest concentration of analogue did not raise coronary blood flow to a level x 50% of maximum possible increase. In such a case we report % increase in flow over control at the plasma nucleoside concentration achieved during infusion.
